# Supplementary material
Source: PubMed Central journal article supplement (PMC5911420)

The C-terminal tail of the NEIL1 DNA glycosylase interacts with the human mitochondrial  
single-stranded DNA binding protein

Nidhi Sharma<sup>1</sup>, Srinivas Chakravarthy<sup>2</sup>, Matthew Longley<sup>3</sup>, William C. Copeland<sup>3</sup>, and  
Aishwarya Prakash<sup>1\*</sup>

<sup>1</sup>University of South Alabama, Mitchell Cancer Institute. 1660 Springhill Avenue, Mobile,  
AL – 36604.

<sup>2</sup>Illinois Institute of Technology, Advanced photon source, Bldg. 435B/ Sector 18, 9700  
S. Cass Avenue, Argonne, IL 60439-4860

<sup>3</sup>National Institute of Environmental Health Sciences, 111 T.W. Alexander Drive,  
Research Triangle Park, NC 27709.

Tel.: 251-410-4915

E-mail: aprakash@health.southalabama.edu

\* To whom correspondence should be addressed.

## **Supplemental Information**

1. Supplemental Methods
2. Supplemental Figures

## **1. Supplemental Methods**

### *1.1. DNA glycosylase activity assay*

Glycosylase/lyase assays were performed with  $\gamma$ -<sup>32</sup>P labeled Sp1-containing substrate (20 nM) and increasing concentrations of full-length NEIL1 in 20 mM HEPES, pH 7.5, 150 mM NaCl, 2 mM EDTA (pH 8.0) with 200  $\mu$ g/ml BSA at 25 °C for 30 minutes [1]. The assay was performed in absence or presence of mtSSB at 0.5 or 10-fold molar excess. The reactions were stopped with the addition of an equal volume of formamide loading buffer (98% formamide, 5 mM EDTA, 0.1% xylene cyanol and 0.1% bromophenol blue) to assay for both glycosylase and lyase activities. The reaction products were separated from the uncleaved substrates with a 12% (w/v) denaturing polyacrylamide gel and quantified with an isotope imaging system (Molecular Imaging System, Bio-Rad).

### *1.2. Protein painting and mass spectrometry*

Protein painting experiments were performed as described previously [2]. Briefly, NEIL1-FL, mtSSB, and NEIL1-mtSSB complex each 200 pmol (total 50  $\mu$ l) were mixed with 100 molar excess of disodium;1-amino-9,10-dioxo-4-[3-(2-sulphonatooxyethyl sulphonyl)anilino]anthracene-2-sulphonate (RBB) and incubated for 5 min. The His-tag has not been cleaved from full-length NEIL1 while mtSSB was untagged. In total 5 molecular paints were tested initially and RBB was determined to be the best paint molecule to use for our NEIL1-mtSSB complexes. The NEIL1-mtSSB complex was prepared by mixing the two proteins on ice followed by incubation for 1 hr. The protein-RBB mixture was then passed through a size exclusion column (Sephadex G25, Roche) to separate excess RBB by centrifugation at 1000 x g for 1 min. The flow through containing the protein/complex was then denatured by the addition of 2 M urea, reduced using 10 mM dithiothreitol for 15 min at room temperature, and alkylated with 50 mM

iodoacetamide. Thereafter, trypsin (Promega) digestion was performed with 1:100 w/w trypsin:protein ratio for 1 hr at room temperature. The protease reaction was stopped using glacial acetic acid and tryptic peptides were purified with Zip-Tips (Millipore) followed by mass spectrometry (MS) analysis. The HPLC mobile phases consisted of 3% acetonitrile and 0.2% formic acid in water (solvent A), and 3% water and 0.2% formic acid in acetonitrile (solvent B). Briefly, the samples were loaded onto a C18 pre-column (Agilent Technologies) using 5% solvent B. The eluted sample from pre-column was then loaded onto a separating Hypersil Gold C18 column (ThermoFisher Scientific). Peptide elution was performed using a gradual linear gradient (0 - 40%) of solvent B. During the elution, the peptides were ionized by electrospray ionization and subjected to MS analysis using the LTQ-Orbitrap XL hybrid mass spectrometer. The RAW files were generated using XCalibur software (ThermoFisher Scientific) and protein identification was performed with the Mascot server. Each sample was searched against a custom database containing the sequences for NEIL1 and mtSSB. Search parameters were set to 10 ppm peptide mass tolerance, 0.6 Da fragment mass tolerance, and semi-tryptic enzyme specification. Two missed cleavages were allowed. Analyses for identification of interface residues was performed as previously described [2]. Briefly, tryptic peptides obtained from individual painted proteins were subtracted from those obtained from the painted complex. The resulting peptides contained residues from the protein-protein interaction interface.

### *1.3. Preparation of mitochondrial extracts and western-blot analysis*

Mitochondria from HCT-116 cells were isolated as described previously [3]. The mitochondrial pellets were treated with 0.5 mg/ml Proteinase K and heated for 5 min at 95 °C followed by centrifugation at 10,000 x g for 5 min. The pellet was resuspended in Laemmli buffer and proteins were separated by SDS-PAGE. The proteins were

transferred to a PVDF membrane and blocked with 3% bovine serum albumin at room temperature for 1 hr. The membrane was incubated overnight with anti-NEIL1 ab (1:200) (Santa Cruz sc-271164) at 4 °C followed by incubation with an anti-mouse horseradish peroxidase conjugated secondary antibody for 1 hr at room temperature. The proteins were detected by chemiluminescence (Super Signal West Femto; ThermoScientific) on a ChemiDoc imager (Bio-Rad). Images were visualized using Image Lab (Bio-Rad).

## **2. Supplemental Figures**

### **Figure Legends:**

**Supplementary Figure 1:** NEIL1 is present in purified human mitochondrial extracts. Western-blot analysis was performed by loading purified mitochondrial extracts from HCT-116 cells treated with 0.5 mg/ml Proteinase K. Purified NEIL1-FL was also loaded as a positive control. The membrane was probed with an anti-NEIL1 antibody (Santa Cruz), an anti-VDAC1 antibody as a mitochondrial loading control, and an anti-lamin A/C antibody for nuclear control.

**Supplementary Figure 2:** (A) General scheme of the protein painting procedure adapted from Luchini A. et. al. [2]. (i) Proteins are combined with 100 molar excess of molecular paints for 5 minutes. (ii) Unbound paint molecules are washed away using a mini size-exclusion chromatography spin column. (iii) The protein complex is dissociated and denatured using 2 M urea. (iv) Proteins are linearized by reduction with dithiothreitol (DTT) and further alkylated with iodoacetamide. (v) Linearized proteins are treated with trypsin. (vi) Tryptic fragments are analyzed by mass-spectrometry. The molecular paints block solvent accessible trypsin cleavage sites. Therefore, tryptic fragments are generated only from unpainted interaction regions of the protein complex. (B) Peptides

identified by MS in NEIL1 and mtSSB when 5 paints MV, CR, AO50, RBB and ANSA were used individually to coat the protein surface. (C) NEIL1 tryptic peptides generated before (*top panel*) and after (*bottom panel*) treatment with paint molecule RBB shown in red mapped on NEIL1 sequence. (D) mtSSB tryptic peptides generated before (*top panel*) and after (*middle panel*) treatment with paint molecule RBB shown in red mapped on the mtSSB sequence. *Bottom panel* indicates a cartoon representation of the mtSSB homotetramer with the peptide (107-132) obtained after RBB treatment highlighted in red. The peptide is present at the intramolecular interface. (E) NEIL1 and mtSSB tryptic peptides generated before and after treatment of the NEIL1-mtSSB complex with paint molecule RBB. The peptides generated exclusively for the coated complex (Set B - Set A) are colored in green. (F) Structural model of full-length NEIL1 generated using Phyre2 [4] showing the location of peptides obtained after complex formation.

**Supplementary Figure 3:** Far-western analysis to determine the minimal construct of NEIL1 required for an interaction between NEIL1 and mtSSB. 50 pmol of all NEIL1 constructs, bovine serum albumin (negative control), glutathione S-transferase (negative control), and 10 pmol of mtSSB were loaded onto the gel. Far-western analysis was performed and proteins were transferred to a PVDF membrane, denatured, slowly renatured on the membrane, and incubated with 1 mg/ml HEK-293T whole cell extract and probed with an anti-mtSSB antibody to detect an interaction.

**Supplementary Figure 4:** SEC analysis of NEIL1- $\Delta$ 100-mtSSB, mtSSB-DNA, and NEIL1-DNA-mtSSB complexes. (A) NEIL1- $\Delta$ 100 does not form complex with mtSSB. *Top panel*, elution profiles from Superdex 200 column chromatography. Black line, NEIL1- $\Delta$ 100-mtSSB tetramer (1:1 molar ratio) mixture; red line, mtSSB alone; and grey line, NEIL1- $\Delta$ 100 alone. The two proteins elute as separate peaks. *Bottom panel*, SDS-

PAGE analysis of fractions collected after SEC. Lane 1, marker; lane 2, NEIL1- $\Delta$ 100; lane 3, mtSSB; lane 4, NEIL1- $\Delta$ 100-mtSSB mixture input prior to gel filtration; lane 5-10, fractions 29-34 obtained after gel filtration corresponding to elution volume 14.5-17 ml. 0.5 ml fractions were collected for all samples. (B) SEC elution profile of mtSSB (red), NEIL1 (yellow), mtSSB-DNA (blue), NEIL1-DNA (magenta), NEIL1-DNA-mtSSB (green) complexes. The NEIL1-DNA-mtSSB complex elutes (elution volume, 12.2 ml) before the mtSSB-DNA complex (elution volume, 13.1 ml) and NEIL1-DNA complex (elution volume, 13.44 ml).

**Supplementary Figure 5:** Scattering curves of (A) NEIL1, (B) mtSSB, (C) mtSSB-DNA, (D) NEIL1-mtSSB, and (E) NEIL1-DNA-mtSSB complex. The Guinier region showing linearity for each protein/complex is shown in the inset.

**Supplementary Figure 6:** mtSSB inhibits NEIL1 glycosylase activity on a single-stranded DNA substrate containing Sp1. Decrease in DNA glycosylase activity (decrease in product formation) was observed when the substrate was incubated with 0.5 and 10 molar excess of mtSSB. As expected, mtSSB alone does not cleave the DNA substrate.

#### **References:**

- [1] A. Prakash, B.L. Carroll, J.B. Sweasy, S.S. Wallace, S. Doublié, Genome and cancer single nucleotide polymorphisms of the human NEIL1 DNA glycosylase: activity, structure, and the effect of editing, *DNA repair*, 14 (2014) 17-26.
- [2] A. Luchini, V. Espina, L.A. Liotta, Protein painting reveals solvent-excluded drug targets hidden within native protein–protein interfaces, *Nature communications*, 5 (2014).

[3] P. Sykora, S. Kanno, M. Akbari, T. Kulikowicz, B. Baptiste, G. Leandro, H. Lu, J. Tian, A. May, K. Becker, DNA polymerase beta participates in mitochondrial DNA repair, *Molecular and Cellular Biology*, (2017) MCB. 00237-00217.

[4] L.A. Kelley, S. Mezulis, C.M. Yates, M.N. Wass, M.J. Sternberg, The Phyre2 web portal for protein modeling, prediction and analysis, *Nature protocols*, 10 (2015) 845-858.

Supplemental Figure 1

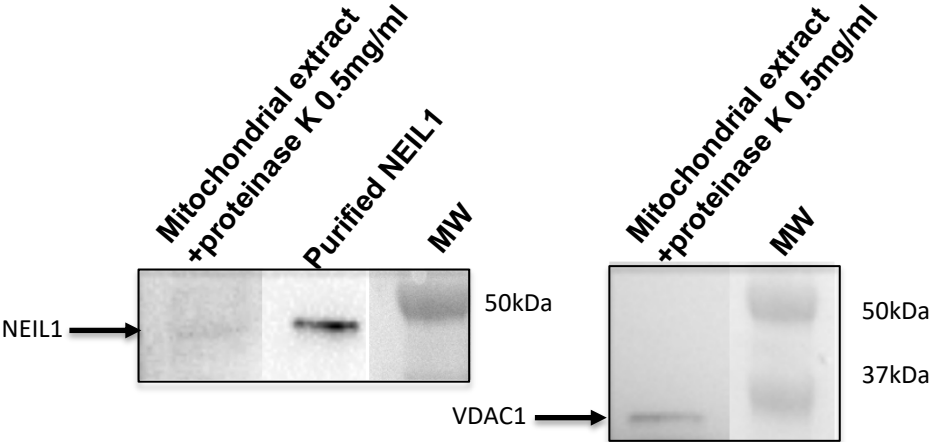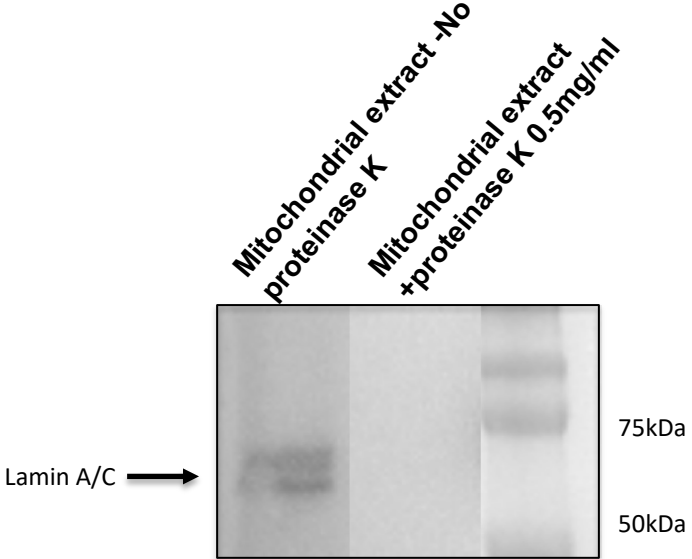



# Supplemental Figure 2A

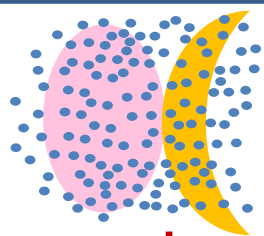

(i)  
Paint molecules saturate the solvent accessible protein surface

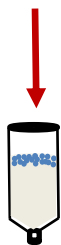

(ii)  
Unbound paint molecules are washed away by size exclusion

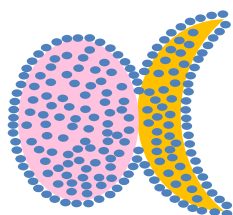

(iii)  
Protein complex is denatured and dissociated

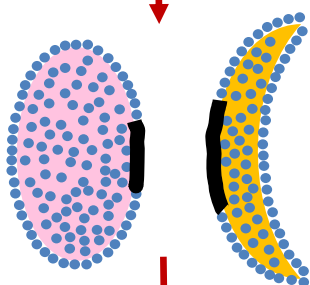

(iv)  
Proteins are linearized by reduction and alkylation

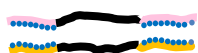

(v)  
Linearized proteins are digested by trypsin

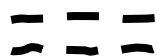

(vi)  
Tryptic peptides analyzed by MS

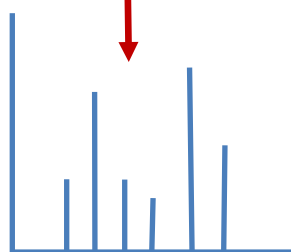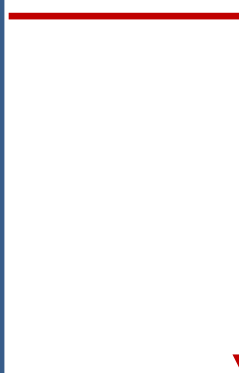

Solvent inaccessible tryptic peptides from individual proteins

Solvent inaccessible tryptic peptides from protein complex

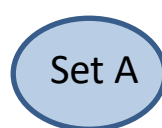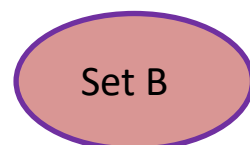

Subtract B-A

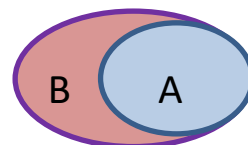

Differentially cleaved trypsin sites representing protein-protein interaction points.

# Supplemental Figure 2B

| <b>NEIL1 + MV</b> |            |            |            |            |            | <b>NEIL1 + RBB</b> |            |            |            |            |            |
|-------------------|------------|------------|------------|------------|------------|--------------------|------------|------------|------------|------------|------------|
| 10                | 20         | 30         | 40         | 50         | 60         | 10                 | 20         | 30         | 40         | 50         | 60         |
| MPEGPELHLA        | SQFVNEACRA | LVFGGCVKES | SVSRNPEVPF | ESSAYRISAS | ARGKELRLIL | MPEGPELHLA         | SQFVNEACRA | LVFGGCVKES | SVSRNPEVPF | ESSAYRISAS | ARGKELRLIL |
| 70                | 80         | 90         | 100        | 110        | 120        | 70                 | 80         | 90         | 100        | 110        | 120        |
| SPLPGAQPQQ        | EPLALVFRFG | MSGSFQLVPR | EELPRHAHLR | FYTAPPGPRL | ALCFVDIRRF | SPLPGAQPQQ         | EPLALVFRFG | MSGSFQLVPR | EELPRHAHLR | FYTAPPGPRL | ALCFVDIRRF |
| 130               | 140        | 150        | 160        | 170        | 180        | 130                | 140        | 150        | 160        | 170        | 180        |
| GRWDLGGKWQ        | PGRGPCVLQE | YQFRESVLR  | NLADKAFDRP | ICEALLDQRF | FNGIGNYLRA | GRWDLGGKWQ         | PGRGPCVLQE | YQFRESVLR  | NLADKAFDRP | ICEALLDQRF | FNGIGNYLRA |
| 190               | 200        | 210        | 220        | 230        | 240        | 190                | 200        | 210        | 220        | 230        | 240        |
| EILYRLKIPP        | FEKARSVLEA | LQHRPSPPEL | TLSQKIRTKL | QNPDLLELCH | SVPKEVVQLG | EILYRLKIPP         | FEKARSVLEA | LQHRPSPPEL | TLSQKIRTKL | QNPDLLELCH | SVPKEVVQLG |
| 250               | 260        | 270        | 280        | 290        | 300        | 250                | 260        | 270        | 280        | 290        | 300        |
| GKGYGSESGE        | EDFAAFRAWL | RCYGMGMSS  | LQDRHGRTIW | FQGDGPPLAP | KGRKSRKKKS | GKGYGSESGE         | EDFAAFRAWL | RCYGMGMSS  | LQDRHGRTIW | FQGDGPPLAP | KGRKSRKKKS |
| 310               | 320        | 330        | 340        | 350        | 360        | 310                | 320        | 330        | 340        | 350        | 360        |
| KATQLSPEDR        | VEDALPPSKA | PSRTRRAKRD | LPKRTATQRP | EGTSLQQDPE | APTVPKKGRR | KATQLSPEDR         | VEDALPPSKA | PSRTRRAKRD | LPKRTATQRP | EGTSLQQDPE | APTVPKKGRR |
| 370               | 380        | 390        |            |            |            | 370                | 380        | 390        |            |            |            |
| KGRQAASGHC        | RPRKVKADIP | SLEPEGTSAS | LE         |            |            | KGRQAASGHC         | RPRKVKADIP | SLEPEGTSAS | LE         |            |            |
| <b>mtSSB + MV</b> |            |            |            |            |            | <b>mtSSB + RBB</b> |            |            |            |            |            |
| 10                | 20         | 30         | 40         | 50         | 60         | 10                 | 20         | 30         | 40         | 50         | 60         |
| ESETTSSLVL        | ERSLNRVHLL | GRVQDQVLR  | QVEGKNPVTI | FSLATNEMWR | SGDSEVYQLG | ESETTSSLVL         | ERSLNRVHLL | GRVQDQVLR  | QVEGKNPVTI | FSLATNEMWR | SGDSEVYQLG |
| 70                | 80         | 90         | 100        | 110        | 120        | 70                 | 80         | 90         | 100        | 110        | 120        |
| DVSQKTTWHR        | ISVFRPGLRD | VAYQYVKKGS | RIYLEGKIDY | GEYMDKNNVR | RQATTIADN  | DVSQKTTWHR         | ISVFRPGLRD | VAYQYVKKGS | RIYLEGKIDY | GEYMDKNNVR | RQATTIADN  |
| 130               |            |            |            |            |            | 130                |            |            |            |            |            |
| IIFLSDQTKE        | KE         |            |            |            |            | IIFLSDQTKE         | KE         |            |            |            |            |

| <b>NEIL1 + AO50</b> |            |            |            |            |            | <b>NEIL1 + CR</b>      |            |            |            |            |            |
|---------------------|------------|------------|------------|------------|------------|------------------------|------------|------------|------------|------------|------------|
| 10                  | 20         | 30         | 40         | 50         | 60         | No peptides identified |            |            |            |            |            |
| MPEGPELHLA          | SQFVNEACRA | LVFGGCVKES | SVSRNPEVPF | ESSAYRISAS | ARGKELRLIL | <b>mtSSB + CR</b>      |            |            |            |            |            |
| 70                  | 80         | 90         | 100        | 110        | 120        | 10                     | 20         | 30         | 40         | 50         | 60         |
| SPLPGAQPQQ          | EPLALVFRFG | MSGSFQLVPR | EELPRHAHLR | FYTAPPGPRL | ALCFVDIRRF | ESETTSSLVL             | ERSLNRVHLL | GRVQDQVLR  | QVEGKNPVTI | FSLATNEMWR | SGDSEVYQLG |
| 130                 | 140        | 150        | 160        | 170        | 180        | 70                     | 80         | 90         | 100        | 110        | 120        |
| GRWDLGGKWQ          | PGRGPCVLQE | YQFRESVLR  | NLADKAFDRP | ICEALLDQRF | FNGIGNYLRA | DVSQKTTWHR             | ISVFRPGLRD | VAYQYVKKGS | RIYLEGKIDY | GEYMDKNNVR | RQATTIADN  |
| 190                 | 200        | 210        | 220        | 230        | 240        | 130                    |            |            |            |            |            |
| EILYRLKIPP          | FEKARSVLEA | LQHRPSPPEL | TLSQKIRTKL | QNPDLLELCH | SVPKEVVQLG | IIFLSDQTKE             | KE         |            |            |            |            |
| 250                 | 260        | 270        | 280        | 290        | 300        | <b>NEIL1 + ANSA</b>    |            |            |            |            |            |
| GKGYGSESGE          | EDFAAFRAWL | RCYGMGMSS  | LQDRHGRTIW | FQGDGPPLAP | KGRKSRKKKS | No peptides identified |            |            |            |            |            |
| 310                 | 320        | 330        | 340        | 350        | 360        | <b>mtSSB + ANSA</b>    |            |            |            |            |            |
| KATQLSPEDR          | VEDALPPSKA | PSRTRRAKRD | LPKRTATQRP | EGTSLQQDPE | APTVPKKGRR | 10                     | 20         | 30         | 40         | 50         | 60         |
| 370                 | 380        | 390        |            |            |            | ESETTSSLVL             | ERSLNRVHLL | GRVQDQVLR  | QVEGKNPVTI | FSLATNEMWR | SGDSEVYQLG |
| KGRQAASGHC          | RPRKVKADIP | SLEPEGTSAS | LE         |            |            | 70                     | 80         | 90         | 100        | 110        | 120        |
| <b>mtSSB + AO50</b> |            |            |            |            |            | DVSQKTTWHR             | ISVFRPGLRD | VAYQYVKKGS | RIYLEGKIDY | GEYMDKNNVR | RQATTIADN  |
| 10                  | 20         | 30         | 40         | 50         | 60         | 130                    |            |            |            |            |            |
| ESETTSSLVL          | ERSLNRVHLL | GRVQDQVLR  | QVEGKNPVTI | FSLATNEMWR | SGDSEVYQLG | IIFLSDQTKE             | KE         |            |            |            |            |
| 70                  | 80         | 90         | 100        | 110        | 120        | <b>NEIL1 + ANSA</b>    |            |            |            |            |            |
| DVSQKTTWHR          | ISVFRPGLRD | VAYQYVKKGS | RIYLEGKIDY | GEYMDKNNVR | RQATTIADN  | No peptides identified |            |            |            |            |            |
| 130                 |            |            |            |            |            | <b>mtSSB + ANSA</b>    |            |            |            |            |            |
| IIFLSDQTKE          | KE         |            |            |            |            | 10                     | 20         | 30         | 40         | 50         | 60         |
|                     |            |            |            |            |            | ESETTSSLVL             | ERSLNRVHLL | GRVQDQVLR  | QVEGKNPVTI | FSLATNEMWR | SGDSEVYQLG |
|                     |            |            |            |            |            | 70                     | 80         | 90         | 100        | 110        | 120        |
|                     |            |            |            |            |            | DVSQKTTWHR             | ISVFRPGLRD | VAYQYVKKGS | RIYLEGKIDY | GEYMDKNNVR | RQATTIADN  |
|                     |            |            |            |            |            | 130                    |            |            |            |            |            |
|                     |            |            |            |            |            | IIFLSDQTKE             | KE         |            |            |            |            |

**MV-** N-(4-{bis[4-(dimethylamino)phenyl]methylene}-2,5-cyclohexadien-1-ylidene)ethanaminium chloride

**AO50-** sodium 4-(4-(benzyl-ethylamino)-ph-azo)-2,5-dichlorobenzenesulphonate (AO50)

**RBB-** disodium; 1-amino-9,10-dioxo-4-[3-(2-sulphonatoxyethylsulphonyl)anilino]anthracene-2-sulphonate

**CR-** disodium; 4-amino-3-[[4-[4-[(1-amino-4-sulphonatonaphthalen-2-yl)diazenyl]phenyl]phenyl]diazenyl]naphthalene-1-sulphonate

**ANSA-** 3,30-Diethylthiacarbocyanine iodide (DECI; Sigma), 8-Anilino-1-naphthalenesulphonic acid

# Supplemental Figure 2C

## NEIL1 (Alone No paint)

|            |            |            |            |            |            |
|------------|------------|------------|------------|------------|------------|
| <u>10</u>  | <u>20</u>  | <u>30</u>  | <u>40</u>  | <u>50</u>  | <u>60</u>  |
| MPEGPELHLA | SQFVNEACRA | LVFGGCVEKS | SVSRNPEVPF | ESSAYRISAS | ARGKELRLIL |
| <u>70</u>  | <u>80</u>  | <u>90</u>  | <u>100</u> | <u>110</u> | <u>120</u> |
| SPLPGAQPQQ | EPLALVFRFG | MSGSFQLVPR | EELPRHAHLR | FYTAPPGPRL | ALCFVDIRRF |
| <u>130</u> | <u>140</u> | <u>150</u> | <u>160</u> | <u>170</u> | <u>180</u> |
| GRWDLGGKWQ | PGRGPCVLQE | YQQFRESVLR | NLADKAFDRP | ICEALLDQRF | FNGIGNYLRA |
| <u>190</u> | <u>200</u> | <u>210</u> | <u>220</u> | <u>230</u> | <u>240</u> |
| EILYRLKIPP | FEKARSVLEA | LQQHRPSPEL | TLSQKIRTKL | QNPDLLELCH | SVPKEVVQLG |
| <u>250</u> | <u>260</u> | <u>270</u> | <u>280</u> | <u>290</u> | <u>300</u> |
| GKGYGSESGE | EDFAAFRAWL | RCYGMPPGMS | LQDRHGRTIW | FQGDGPPLAP | KGRKSRKKKS |
| <u>310</u> | <u>320</u> | <u>330</u> | <u>340</u> | <u>350</u> | <u>360</u> |
| KATQLSPEDR | VEDALPPSKA | PSRTRRAKRD | LPKRTATQRP | EGTSLQODPE | APTVPKKGRR |
| <u>370</u> | <u>380</u> | <u>390</u> |            |            |            |
| KGRQAASGHC | RPRKVKADIP | SLEPEGTSAS | LE         |            |            |

## NEIL1 (Alone + RBB)

|            |            |            |            |            |            |
|------------|------------|------------|------------|------------|------------|
| <u>10</u>  | <u>20</u>  | <u>30</u>  | <u>40</u>  | <u>50</u>  | <u>60</u>  |
| MPEGPELHLA | SQFVNEACRA | LVFGGCVEKS | SVSRNPEVPF | ESSAYRISAS | ARGKELRLIL |
| <u>70</u>  | <u>80</u>  | <u>90</u>  | <u>100</u> | <u>110</u> | <u>120</u> |
| SPLPGAQPQQ | EPLALVFRFG | MSGSFQLVPR | EELPRHAHLR | FYTAPPGPRL | ALCFVDIRRF |
| <u>130</u> | <u>140</u> | <u>150</u> | <u>160</u> | <u>170</u> | <u>180</u> |
| GRWDLGGKWQ | PGRGPCVLQE | YQQFRESVLR | NLADKAFDRP | ICEALLDQRF | FNGIGNYLRA |
| <u>190</u> | <u>200</u> | <u>210</u> | <u>220</u> | <u>230</u> | <u>240</u> |
| EILYRLKIPP | FEKARSVLEA | LQQHRPSPEL | TLSQKIRTKL | QNPDLLELCH | SVPKEVVQLG |
| <u>250</u> | <u>260</u> | <u>270</u> | <u>280</u> | <u>290</u> | <u>300</u> |
| GKGYGSESGE | EDFAAFRAWL | RCYGMPPGMS | LQDRHGRTIW | FQGDGPPLAP | KGRKSRKKKS |
| <u>310</u> | <u>320</u> | <u>330</u> | <u>340</u> | <u>350</u> | <u>360</u> |
| KATQLSPEDR | VEDALPPSKA | PSRTRRAKRD | LPKRTATQRP | EGTSLQODPE | APTVPKKGRR |
| <u>370</u> | <u>380</u> | <u>390</u> |            |            |            |
| KGRQAASGHC | RPRKVKADIP | SLEPEGTSAS | LE         |            |            |

# Supplemental Figure 2D

## mtSSB (Alone No Paint)

10 20 30 40 50 60  
ESETTSLVL ERSLNRVHLL GRVGQDPVLR QVEGKNPVTI FSLATNEMWR SGDSEVYQLG  
70 80 90 100 110 120  
DVSQKTTWHR ISVFRPGLRD VAYQYVKKGS RIYLEGKIDY GEYMDKNNVR RQATTIIADN  
130  
IIFLSDQTKE KE

## mtSSB (Alone + RBB)

10 20 30 40 50 60  
ESETTSLVL ERSLNRVHLL GRVGQDPVLR QVEGKNPVTI FSLATNEMWR SGDSEVYQLG  
70 80 90 100 110 120  
DVSQKTTWHR ISVFRPGLRD VAYQYVKKGS RIYLEGKIDY GEYMDKNNVR RQATTIIADN  
130  
IIFLSDQTKE KE

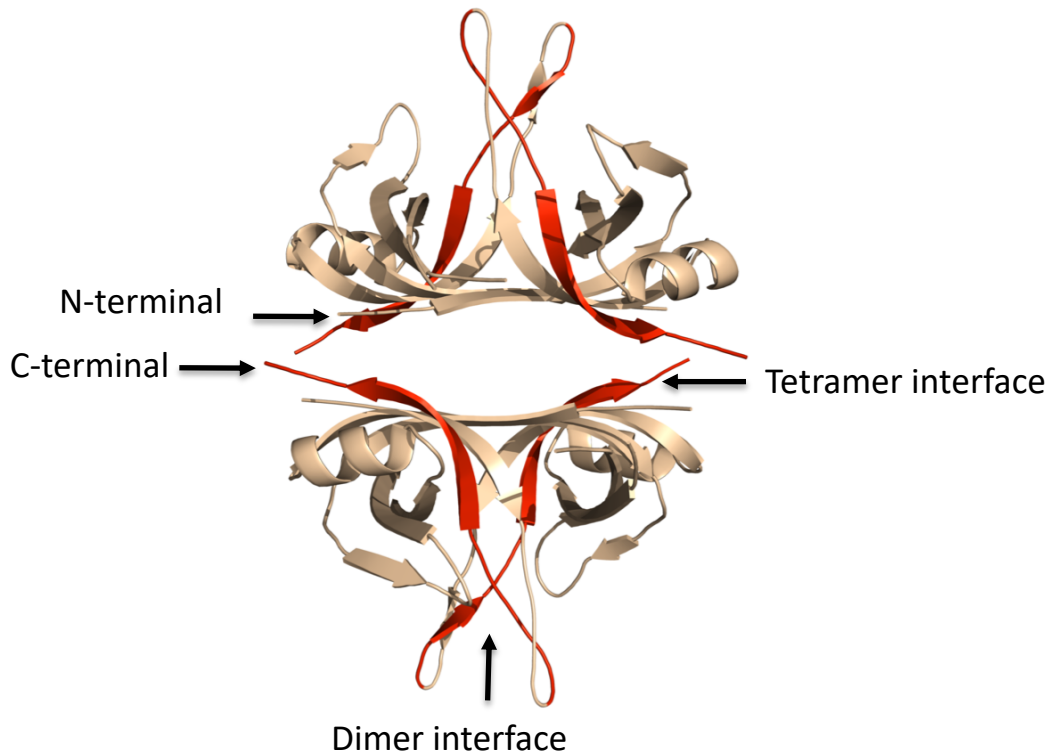

mtSSB tetramer (PDB ID: 3ULL)

# Supplemental Figure 2E

## NEIL1 (NEIL1-mtSSB Complex no paint)

10 20 30 40 50 60  
MPEGP~~ELHLA~~ SQFVNEACRA LVFGGCV~~EKS~~ SVSRNPEV~~PF~~ ESSAYRISAS ARGKELRLIL

70 80 90 100 110 120  
SPLPGAQPQ~~Q~~ EPLALVFRF~~G~~ MSGSFQLV~~PR~~ EELPRHAHLR FYTAPPGPRL ALCFVDIR~~RF~~

130 140 150 160 170 180  
GRWDLGGK~~WQ~~ PGRGPCVLQ~~E~~ YQQFRESV~~LR~~ NLADKAFDR~~P~~ ICEALLDQR~~F~~ FNGIGNYLRA

190 200 210 220 230 240  
EILYRLK~~IPP~~ FEKARSVLEA LQQHRPSPEL TLSQKIRTKL QNPDLLELCH SVPKEVVQ~~LG~~

250 260 270 280 290 300  
GKGYGSESGE EDFAAFRAWL RCYGMPGMSS LQDRHGRTI~~W~~ FQGD~~PGPLAP~~ KGRKSRKK~~S~~

310 320 330 340 350 360  
KATQLSPEDR VEDALPPSKA PSRTRRAKRD LPKRTATQRP EGTSLQDPE APTVPKKGRR

370 380 390  
KGRQAASGHC RPRKVKADIP SLEPEGTSAS LE

## NEIL1 (NEIL1-mtSSB Complex + RBB)

10 20 30 40 50 60  
MPEGP~~ELHLA~~ SQFVNEACRA LVFGGCV~~EKS~~ SVSRNPEV~~PF~~ ESSAYRISAS ARGKELRLIL

70 80 90 100 110 120  
SPLPGAQPQ~~Q~~ EPLALVFRF~~G~~ MSGSFQLV~~PR~~ EELPRHAHLR FYTAPPGPRL ALCFVDIR~~RF~~

130 140 150 160 170 180  
GRWDLGGK~~WQ~~ PGRGPCVLQ~~E~~ YQQFRESV~~LR~~ NLADKAFDR~~P~~ ICEALLDQR~~F~~ FNGIGNYLRA

190 200 210 220 230 240  
EILYRLK~~IPP~~ FEKARSVLEA LQQHRPSPEL TLSQKIRTKL QNPDLLELCH SVPKEVVQ~~LG~~

250 260 270 280 290 300  
GKGYGSESGE EDFAAFRAWL RCYGMPGMSS LQDRHGRTI~~W~~ FQGD~~PGPLAP~~ KGRKSRKK~~S~~

310 320 330 340 350 360  
KATQLSPEDR VEDALPPSKA PSRTRRAKRD LPKRTATQRP EGTSLQDPE APTVPKKGRR

370 380 390  
KGRQAASGHC RPRKVKADIP SLEPEGTSAS LE

## mtSSB (NEIL1-mtSSB Complex No paint)

10 20 30 40 50 60  
ESETTSLVL ERS~~LN~~RVHLL GRV~~G~~QDPVLR QVEGKNPVTI FSLATNEMWR SGDSEVYQ~~LG~~

70 80 90 100 110 120  
DVSQKTTWHR ISVFRPGLRD VAYQYVKKGS RIYLEGKIDY GEYMDKNNVR RQATTIIADN

130  
IIFLSDQTK~~E~~ KE

## mtSSB (NEIL1-mtSSB Complex + RBB)

10 20 30 40 50 60  
ESETTSLVL ERS~~LN~~RVHLL GRV~~G~~QDPVLR QVEGKNPVTI FSLATNEMWR SGDSEVYQ~~LG~~

70 80 90 100 110 120  
DVSQKTTWHR ISVFRPGLRD VAYQYVKKGS RIYLEGKIDY GEYMDKNNVR RQATTIIADN

130  
IIFLSDQTK~~E~~ KE

Supplemental Figure 2F

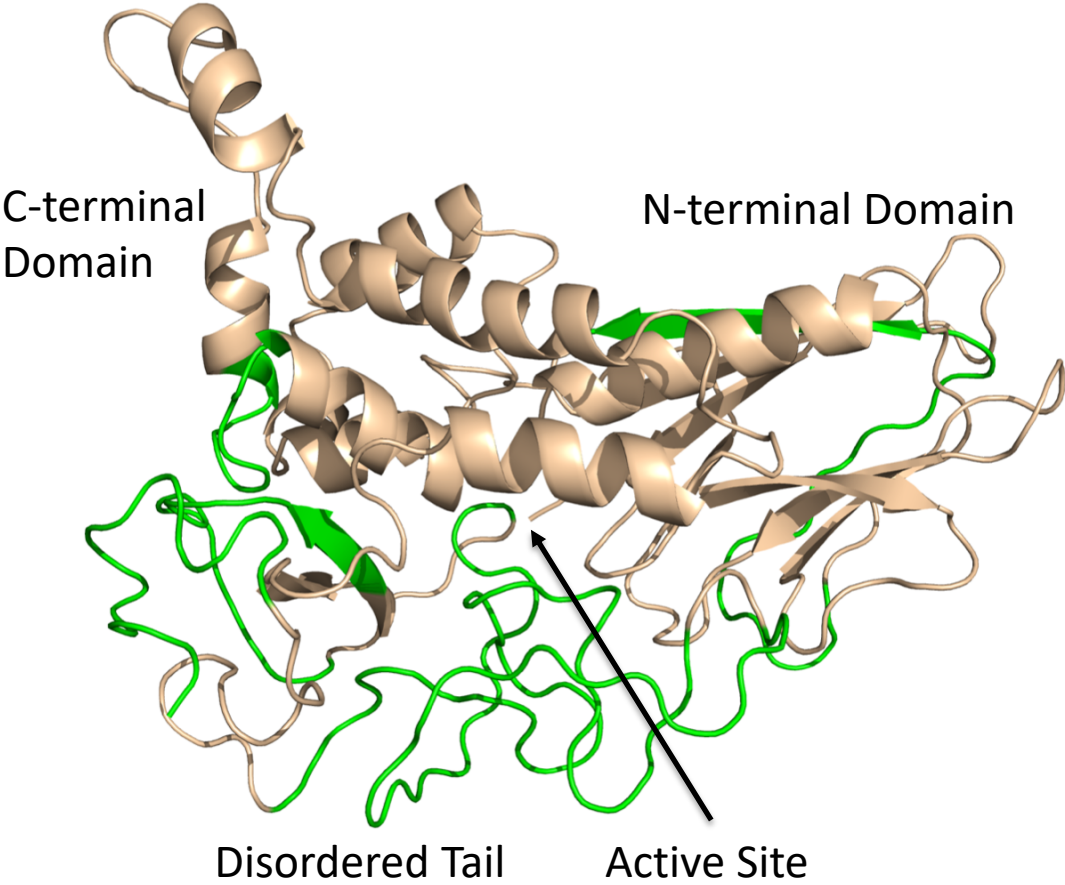

# Supplemental Figure 3

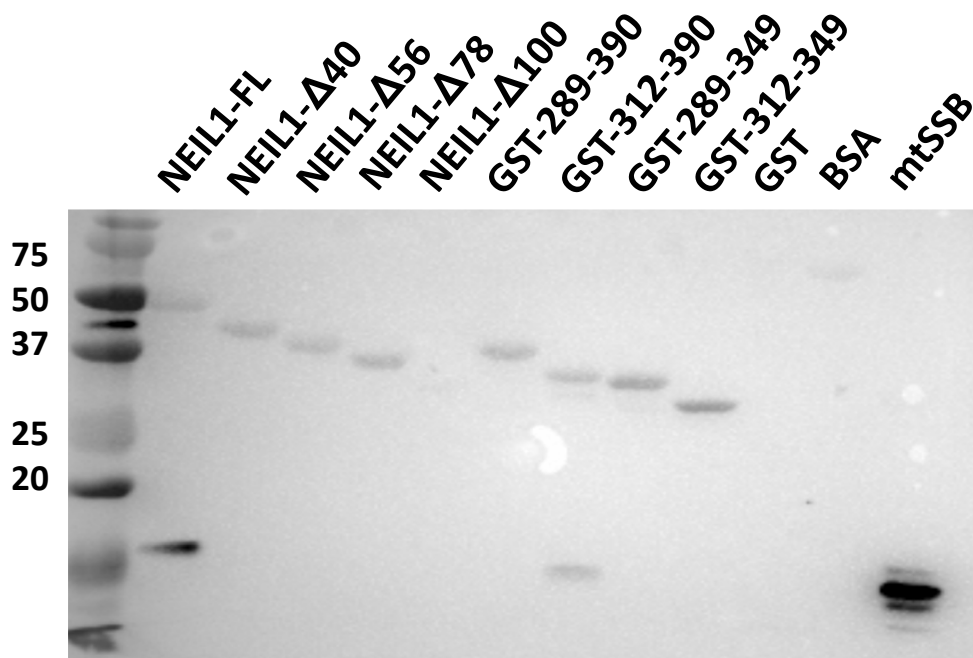

Far western  
HEK-293T Whole cell extract



# Supplemental Figure 4

A

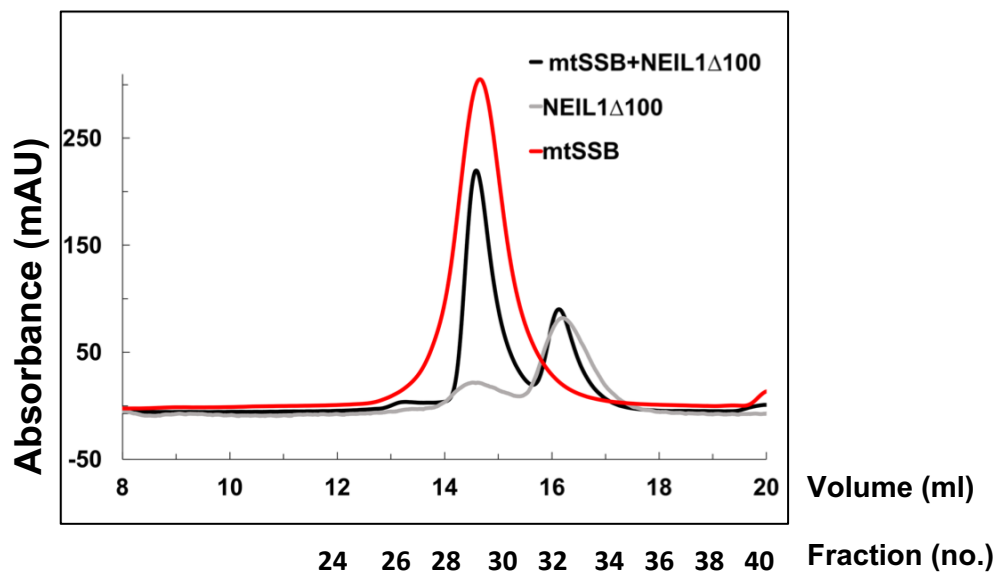

Fraction no.

29 30 31 32 33 34

Lane no.

1 2 3 4 5 6 7 8 9 10

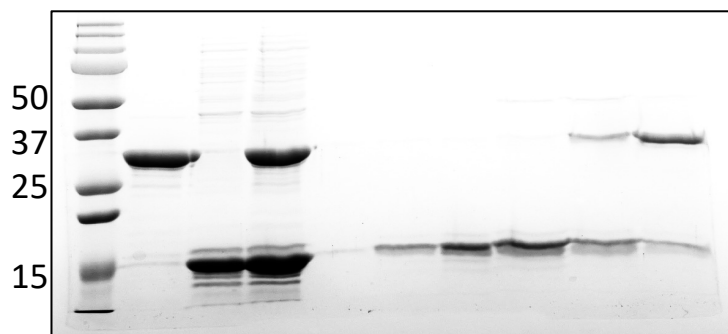

B

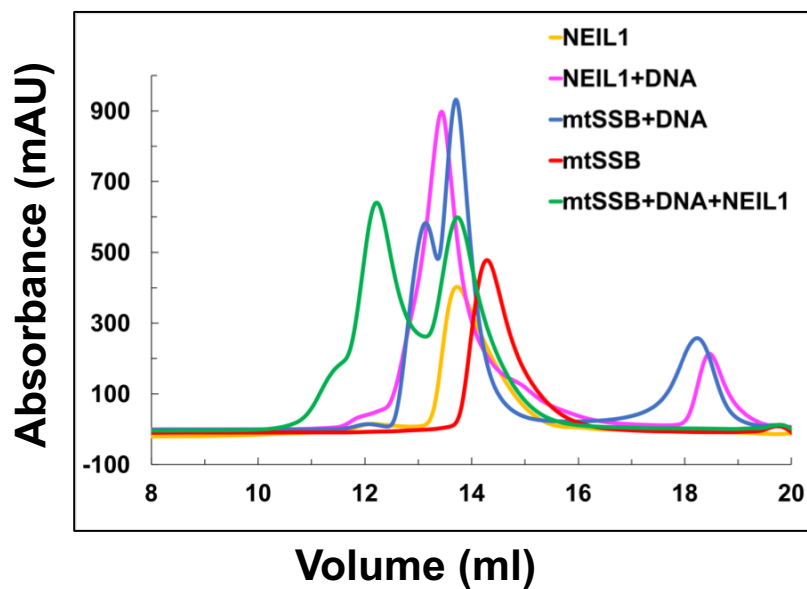



# Supplemental Figure 5

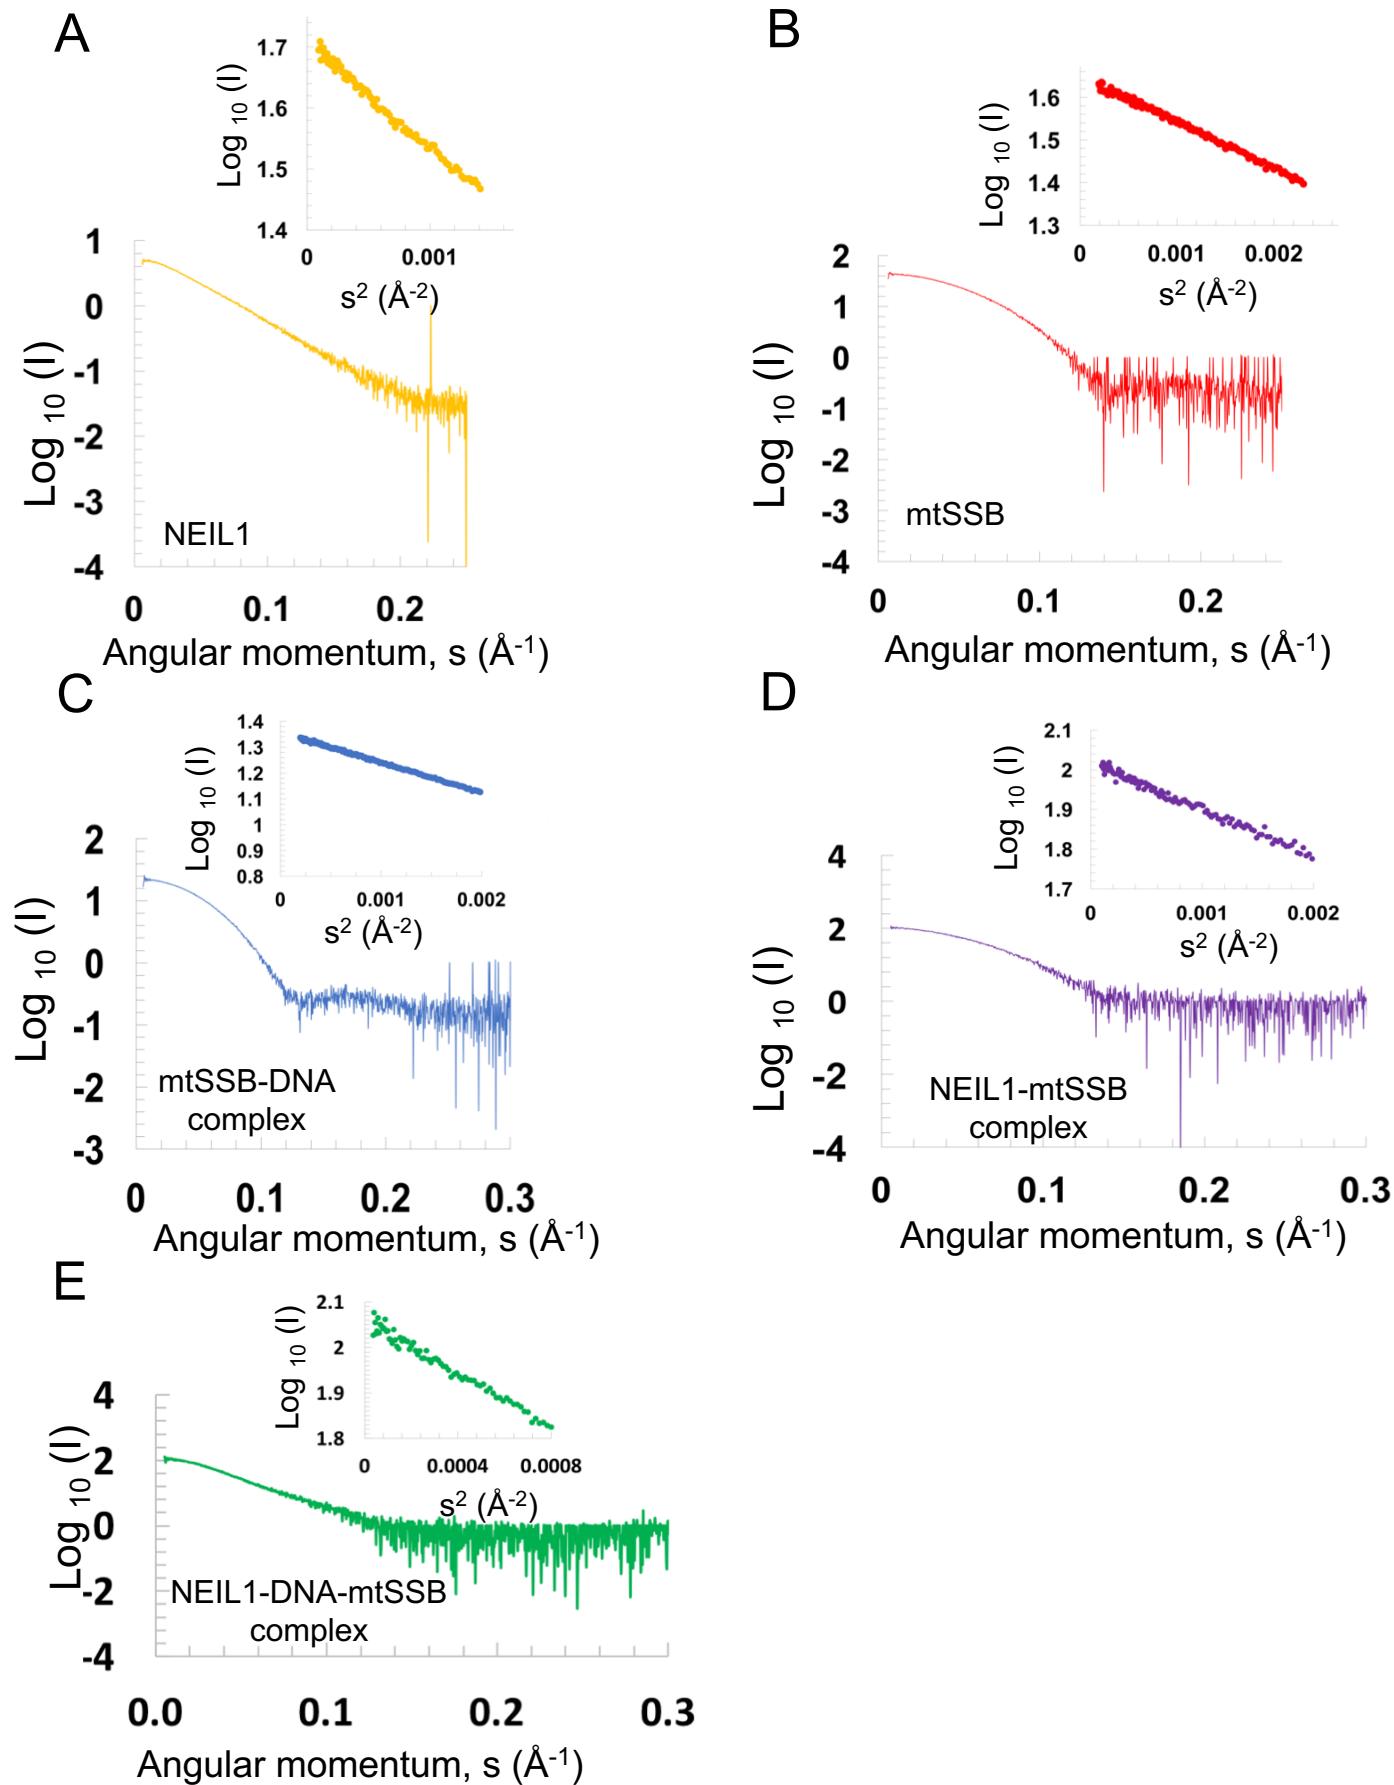

# Supplemental Figure 6

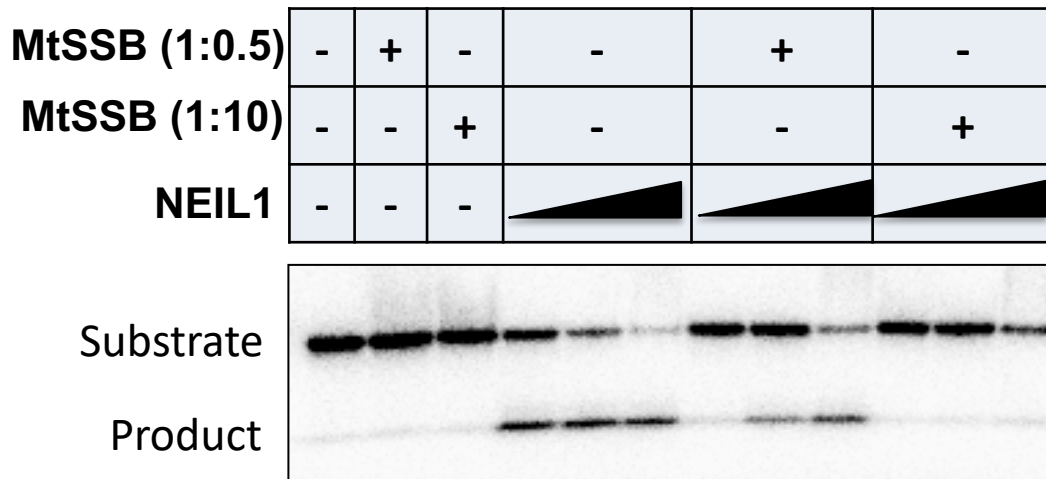

Supplement: NIHMS949839-supplement.pdf [file NIHMS949839-supplement.pdf]
